# Supplementary material for: Contrasting photophysical properties of rhenium(i) tricarbonyl complexes having carbazole groups attached to the polypyridine ligand
Source: Royal Society of Chemistry journal article supplement (doi:10.1039/c6dt01112h), 2016-01-01

## Contrasting photophysical properties of rhenium(I) tricarbonyl complexes having carbazole groups attached to the polypyridine ligand

Luiz D. Ramos, Renato N. Sampaio, Francisco F. de Assis, Kleber T. de Oliveira, Paula Homem-de-Mello, Antonio Otavio T. Patrocínio, Karina P.M. Frin

### Supporting Information

**Table S1:** Structural and vibrational data of *fac*-[Re(L)(cbz<sub>2</sub>phen)(CO)<sub>3</sub>]<sup>0/+</sup> compounds.

| Bond Length           | L    |       |       |
|-----------------------|------|-------|-------|
|                       | Cl   | py    | ampy  |
| Re-C (equatorial) (Å) | 1.91 | 1.92  | 1.92  |
| Re-C (ancillary) (Å)  | 1.90 | 1.92  | 1.92  |
| Re-N (Å)              | 2.15 | 2.16  | 2.16  |
| Re-X (Å)              | 2.52 | 2.20  | 2.25  |
| N-Re-N (°)            | 76.3 | 76.13 | 75.99 |

  

| Compounds                                                                    | Calculated (cm <sup>-1</sup> ) | Experimental (cm <sup>-1</sup> ) |
|------------------------------------------------------------------------------|--------------------------------|----------------------------------|
|                                                                              | mPW1PW91/LANL2DZ               |                                  |
| <i>fac</i> -[ReCl(CO) <sub>3</sub> (cbz <sub>2</sub> phen)]                  | 2023.10; 1941.67; 1916.85      | 2020; 1916; 1895                 |
| <i>fac</i> -[Re(py)(CO) <sub>3</sub> (cbz <sub>2</sub> phen)] <sup>+</sup>   | 2039.35; 1957.22; 1945.56      | 2030; 1923                       |
| <i>fac</i> -[Re(ampy)(CO) <sub>3</sub> (cbz <sub>2</sub> phen)] <sup>+</sup> | 2034.73; 1949.54; 1934.21      | 2025; 1901                       |

**Figure S1a:**  $^1\text{H}$  NMR spectrum of  $\text{cbz}_2\text{phen}$  ( $\text{CDCl}_3/500\text{MHz}$ ,  $25^\circ\text{C}$ ).

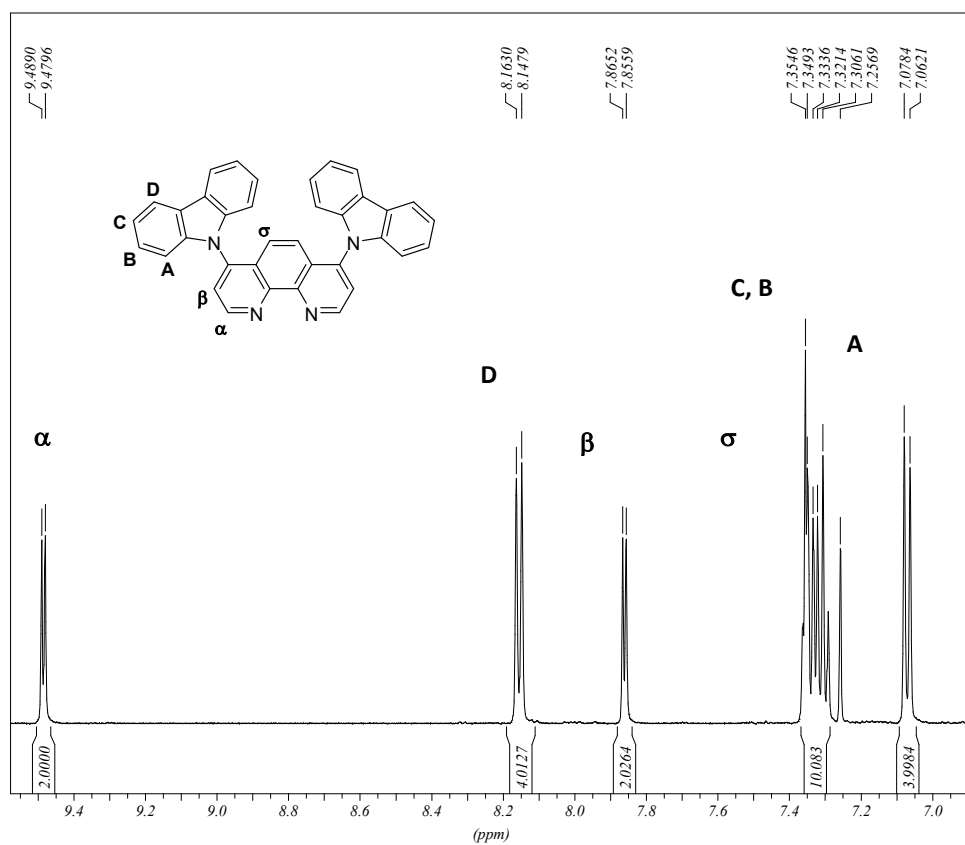

**Figure S1b:**  $^{13}\text{C}\{^1\text{H}\}$  NMR spectrum of  $\text{cbz}_2\text{phen}$  ( $\text{CDCl}_3/125\text{MHz}$ ,  $25^\circ\text{C}$ ).

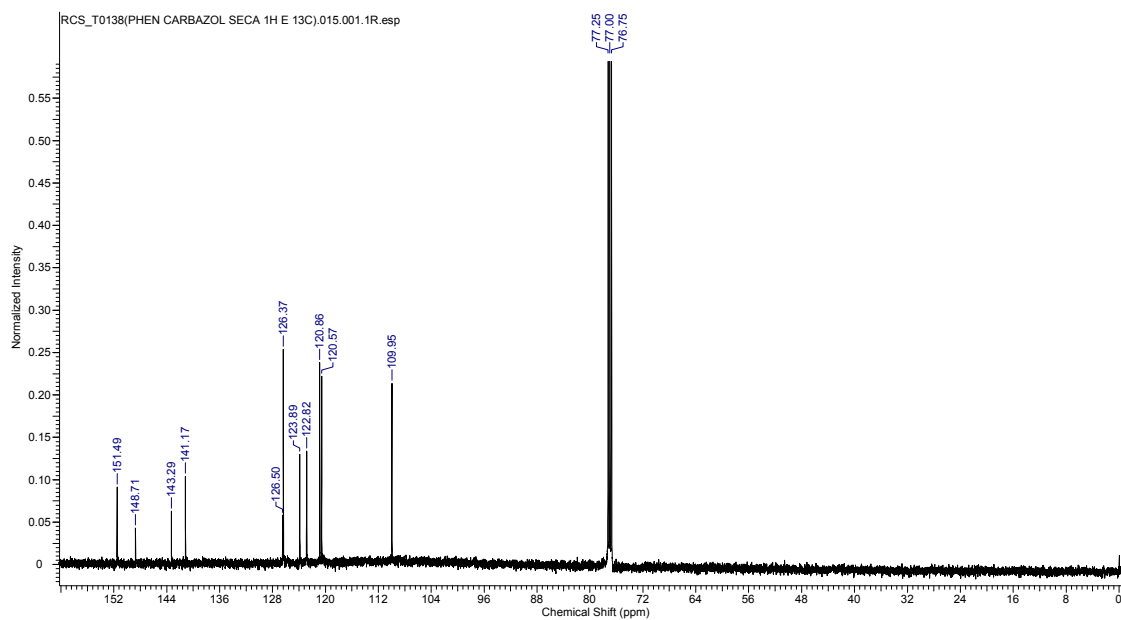

**Figure S1c:** DEPT-135  $^{13}\text{C}$  NMR spectrum of  $\text{cbz}_2\text{phen}$  ( $\text{CDCl}_3/125\text{MHz}$ ,  $25^\circ\text{C}$ )

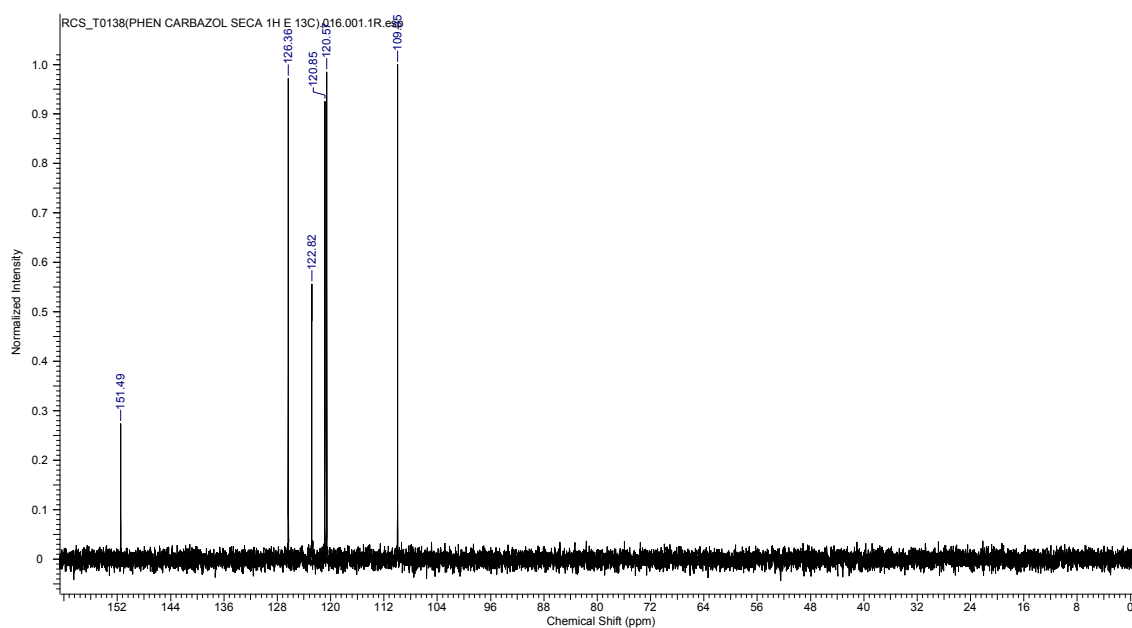

**Figure S2:**  $^1\text{H}$  NMR spectrum of  $\text{fac-}[\text{ReCl}(\text{CO})_3(\text{cbz}_2\text{phen})]$  ( $\text{CD}_2\text{Cl}_2/500\text{MHz}$ ,  $25^\circ\text{C}$ ).

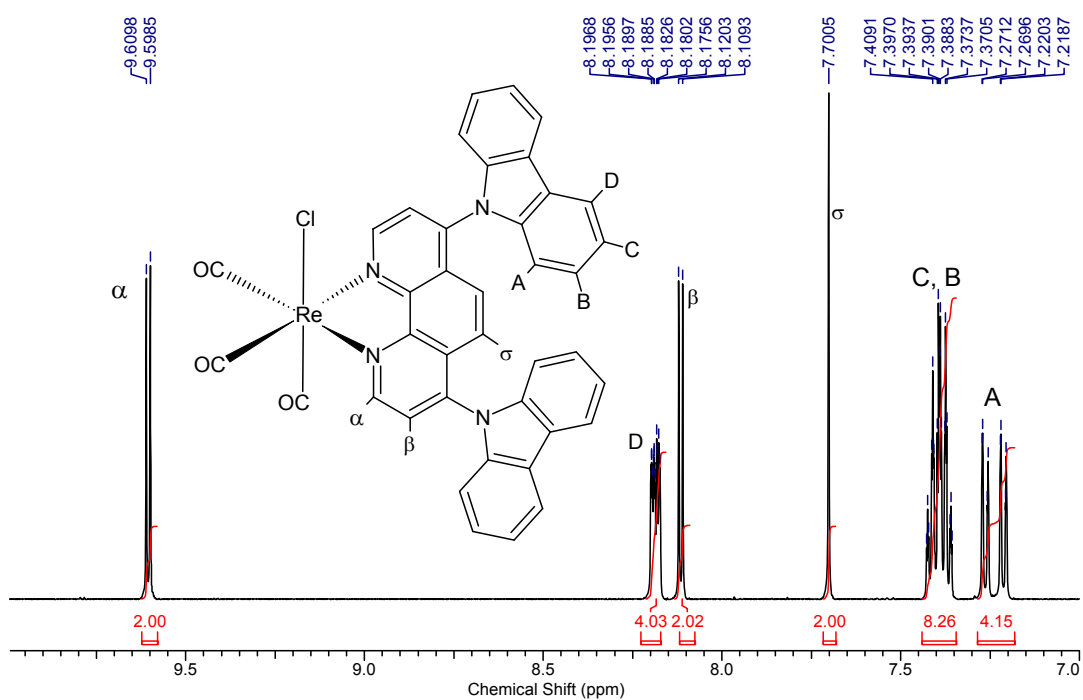

**Figure S3:**  $H-H$  COSY spectrum of  $fac$ -[ReCl(CO)<sub>3</sub>(cbz<sub>2</sub>phen)] (CD<sub>2</sub>Cl<sub>2</sub>/500MHz, 25 °C)

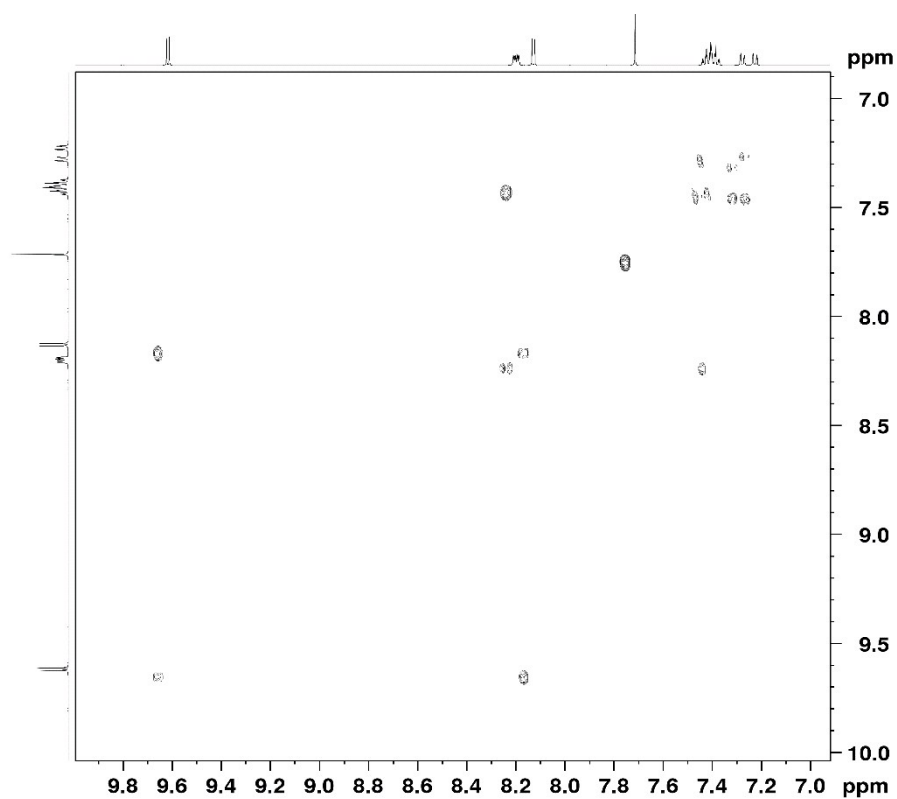

**Figure S4:**  $^1H$  NMR spectrum of  $fac$ -[Re(CO)<sub>3</sub>(cbz<sub>2</sub>phen)(py)]<sup>+</sup> (CD<sub>2</sub>Cl<sub>2</sub>/500MHz, 25 °C)

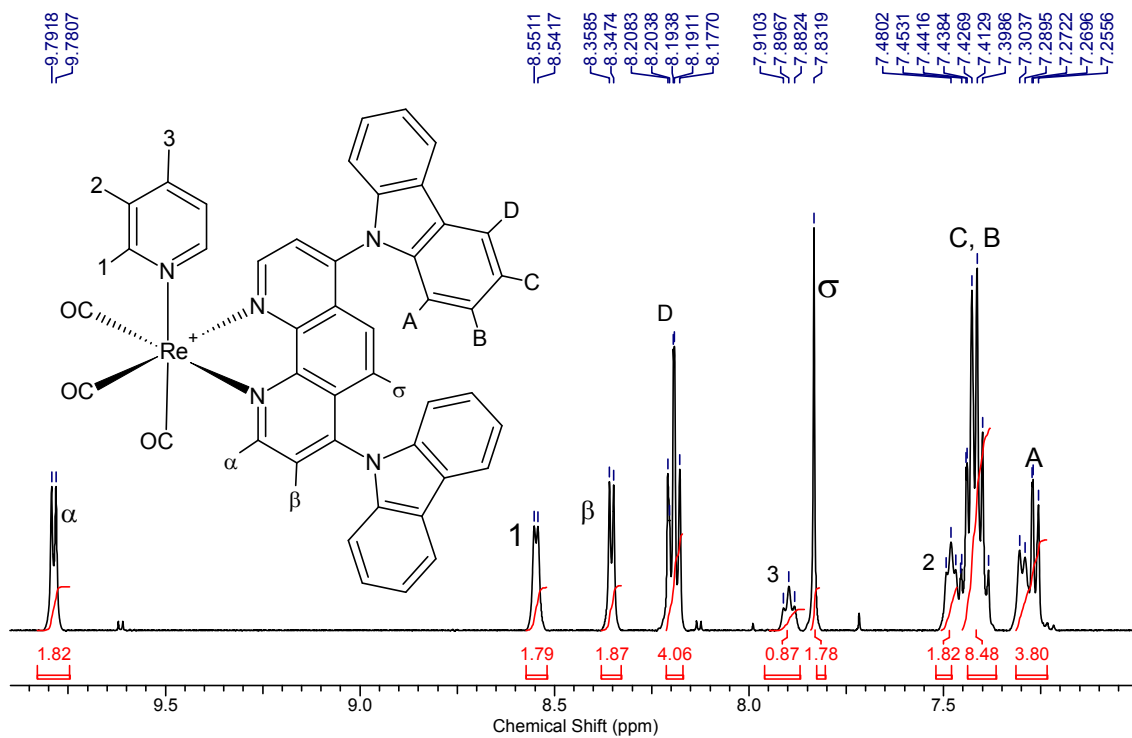

**Figure S5:**  $H-H$  COSY spectrum of  $fac-[Re(py)(CO)_3(cbz_2phen)]^+$  ( $CD_2Cl_2/500$  MHz,  $25$  °C)

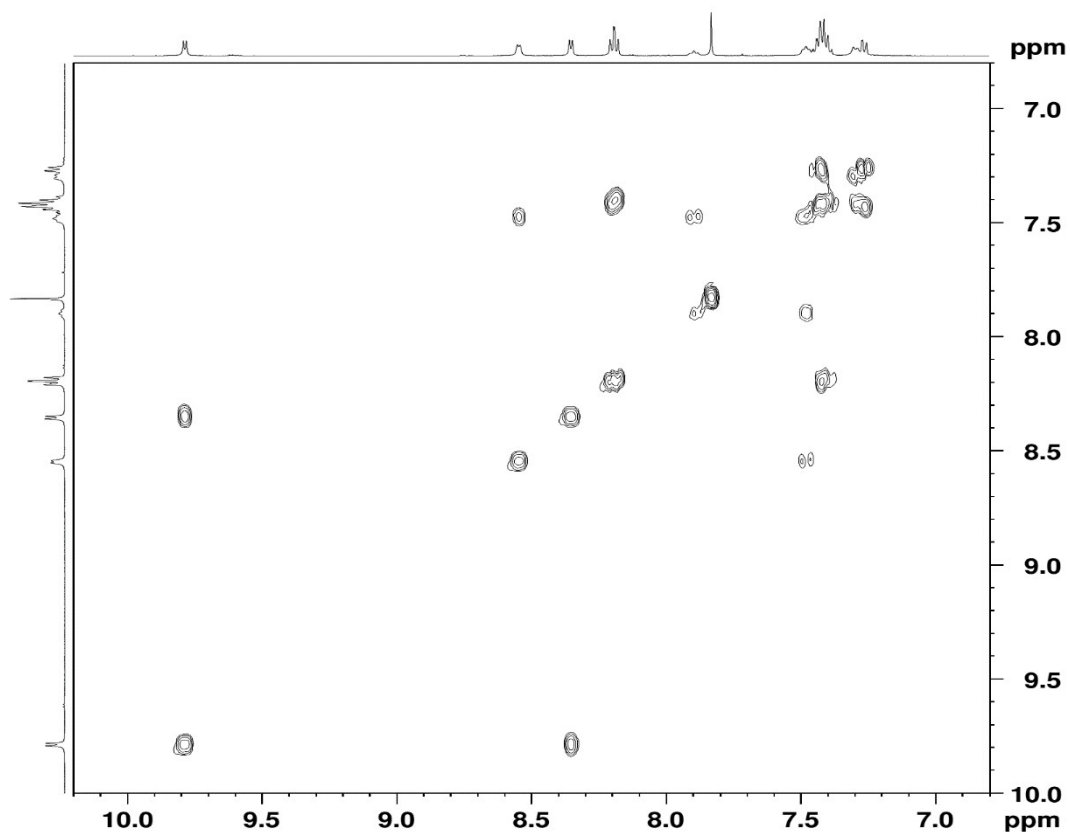

**Figure S6:**  $^1H$  NMR spectrum of  $fac-[Re(CO)_3(cbz_2phen)(ampy)]^+$  ( $CD_2Cl_2/500$  MHz,  $25$  °C)

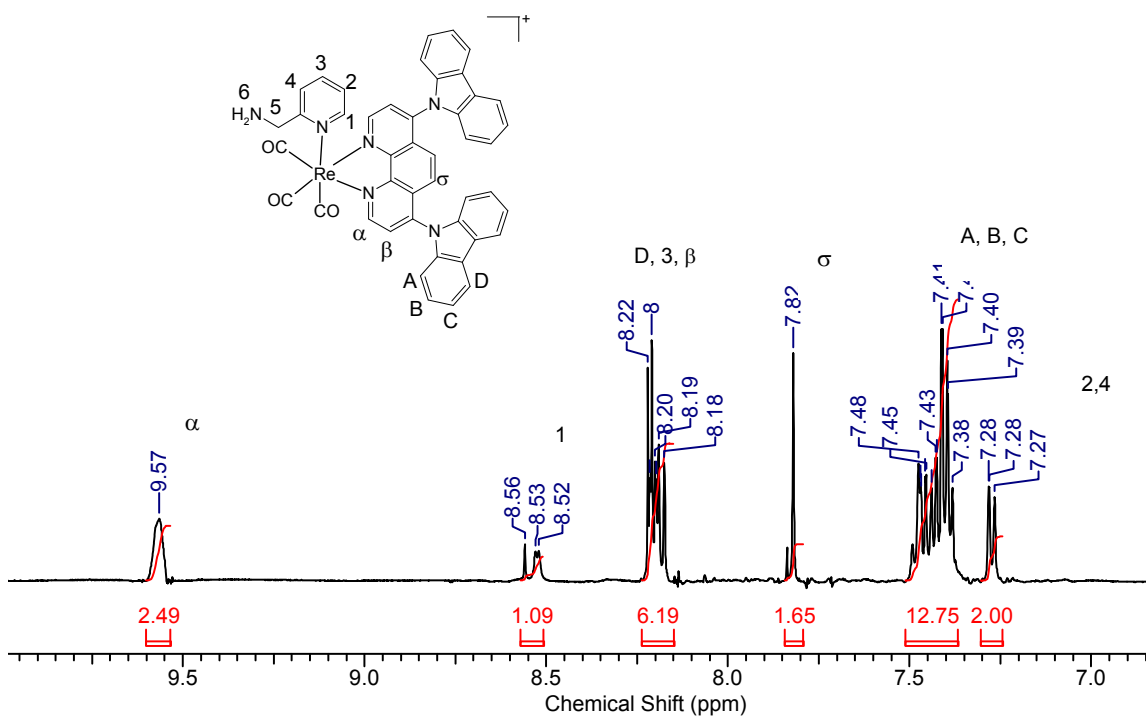

**Table S2:**  $^1\text{H}$  NMR spectral data for rhenium(I) complexes and ligand.

| Compound                                                                            | Proton         | $\delta$ (ppm) | J(Hz)    |
|-------------------------------------------------------------------------------------|----------------|----------------|----------|
| 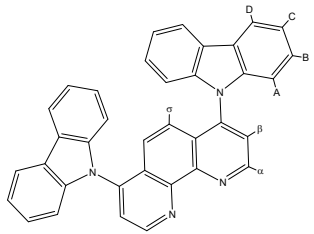   | H $\alpha$ (d) | 9.5            | 4.7      |
|                                                                                     | H $\beta$ (d)  | 7.9            | 4.7      |
|                                                                                     | H $\sigma$ (s) | 7.4            |          |
|                                                                                     | HB(m)          | 7.3            |          |
|                                                                                     | HA(d)          | 7.1            | 8.1      |
|                                                                                     | HC(m)          | 7.3            |          |
|                                                                                     | HD(d)          | 8.1            | 7.6      |
|   | H $\alpha$ (d) | 9.6            | 5.6      |
|                                                                                     | H $\beta$ (d)  | 8.1            | 5.6      |
|                                                                                     | H $\sigma$ (s) | 7.7            |          |
|                                                                                     | HB (m)         | 7.4            |          |
|                                                                                     | HA(dd)         | 7.2            | 7.2      |
|                                                                                     | HC (m)         | 7.4            |          |
| HD (m)                                                                              | 8.2            |                |          |
|  | H $\alpha$ (d) | 9.8            | 5.4      |
|                                                                                     | H $\beta$ (d)  | 8.4            | 5.4      |
|                                                                                     | H $\sigma$ (s) | 7.8            |          |
|                                                                                     | HB(m)          | 7.4            |          |
|                                                                                     | HA(dd)         | 7.3            | 6.9; 7.7 |
|                                                                                     | HC(m)          | 7.4            |          |
|                                                                                     | HD(t)          | 8.2            | 8.1; 7.1 |
|                                                                                     | H1(d)          | 8.5            | 4.4      |
| H2(d)                                                                               | 7.5            |                |          |
| H3(t)                                                                               | 7.9            |                |          |

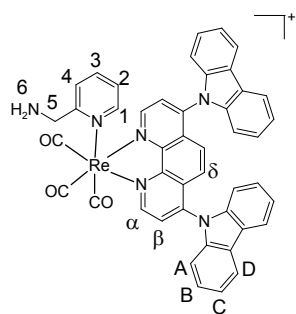

|                |     |     |
|----------------|-----|-----|
| H $\alpha$ (m) | 9.6 |     |
| H $\beta$ (m)  | 8.2 |     |
| H $\sigma$ (s) | 7.8 |     |
| HB(m)          | 7.4 |     |
| HA(m)          | 7.4 |     |
| HC(m)          | 7.4 |     |
| HD(m)          | 8.2 |     |
| H1(d)          | 8.5 | 5.0 |
| H2(d)          | 7.3 | 5.0 |
| H3(m)          | 8.2 |     |
| H4(d)          | 7.3 | 5.0 |

**Figure S7:** Cyclic voltammogram of *fac*-[Re(ampy)(CO)<sub>3</sub>(cbz<sub>2</sub>phen)]<sup>+</sup> (A); *fac*-[Re(py)(CO)<sub>3</sub>(cbz<sub>2</sub>phen)]<sup>+</sup> (B); *fac*-[ReCl(CO)<sub>3</sub>(cbz<sub>2</sub>phen)] (C) in acetonitrile.

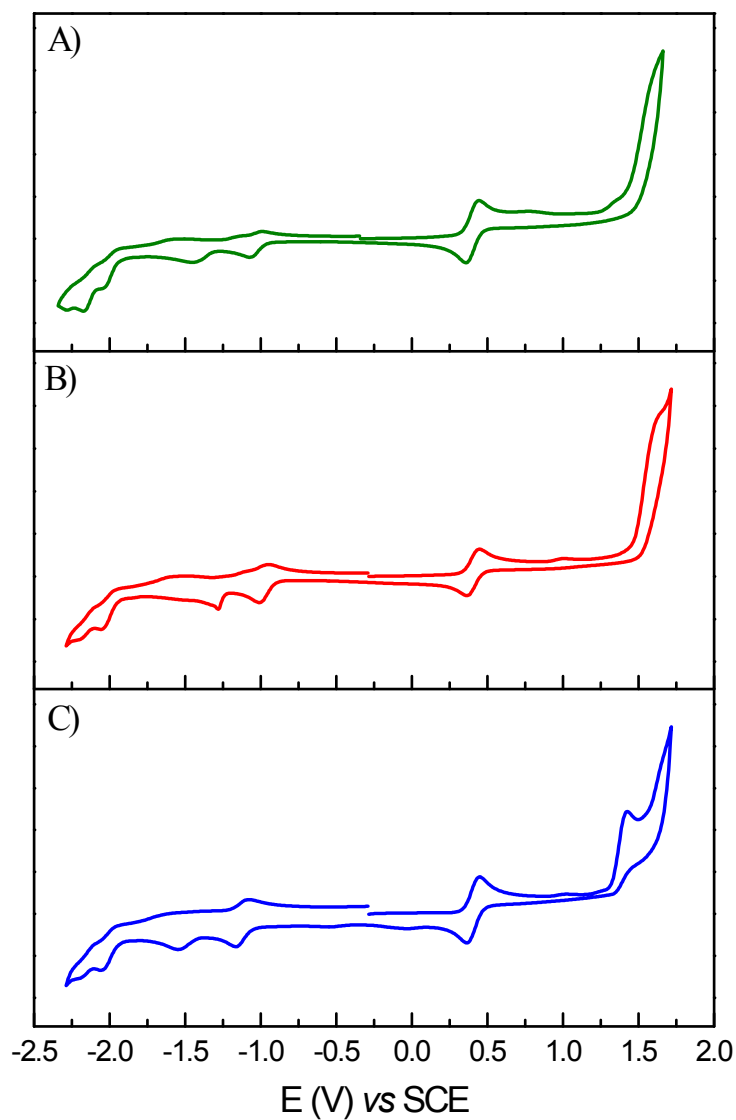

**Figure S8:** Experimental and theoretical spectra (A) and isosurfaces plots of frontier orbitals (B) of *fac*-[Re(py)(CO)<sub>3</sub>(cbz<sub>2</sub>phen)]<sup>+</sup> in acetonitrile.



(A)

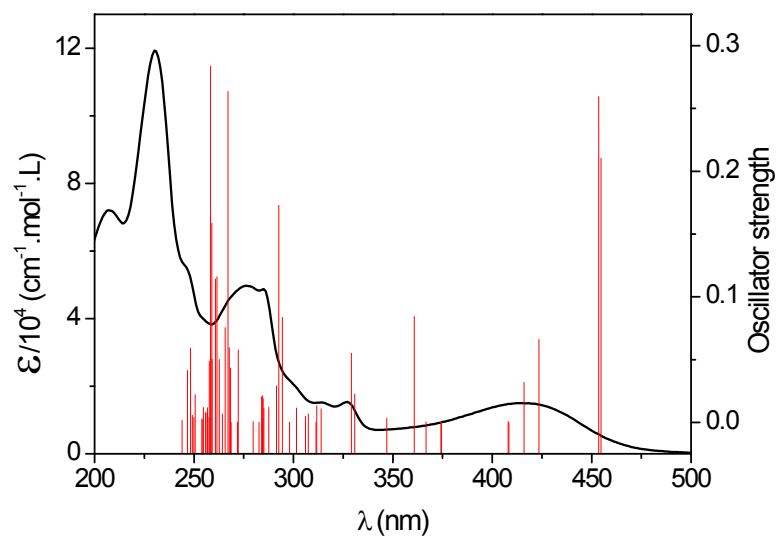

(B)

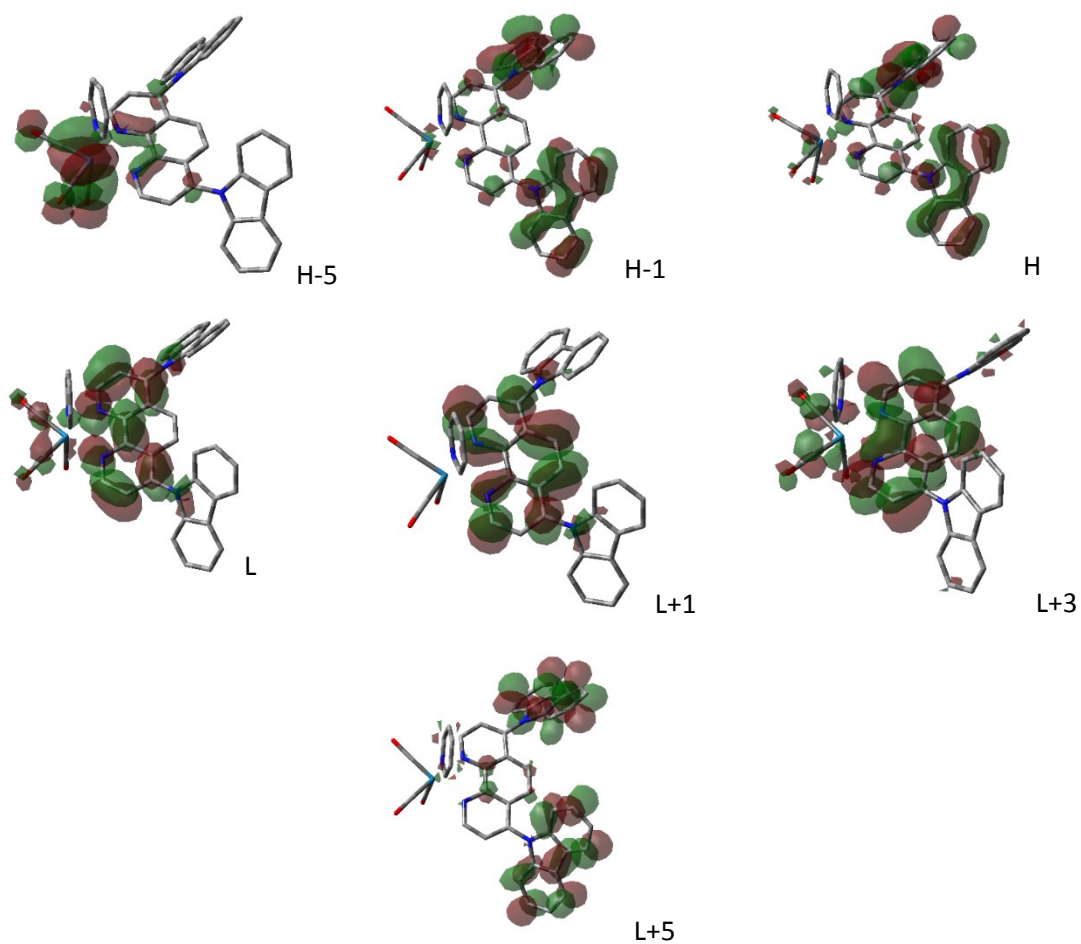

**Figure S9:** Experimental and theoretical spectra (A) and isosurfaces plots of frontier orbitals (B) of  $fac-[Re(ampy)(CO)_3(cbz_2phen)]^+$  in acetonitrile.

(A)

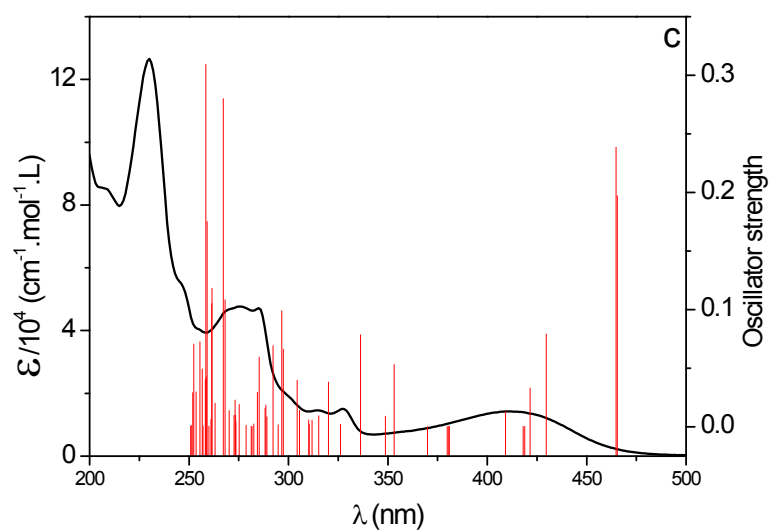

(B)

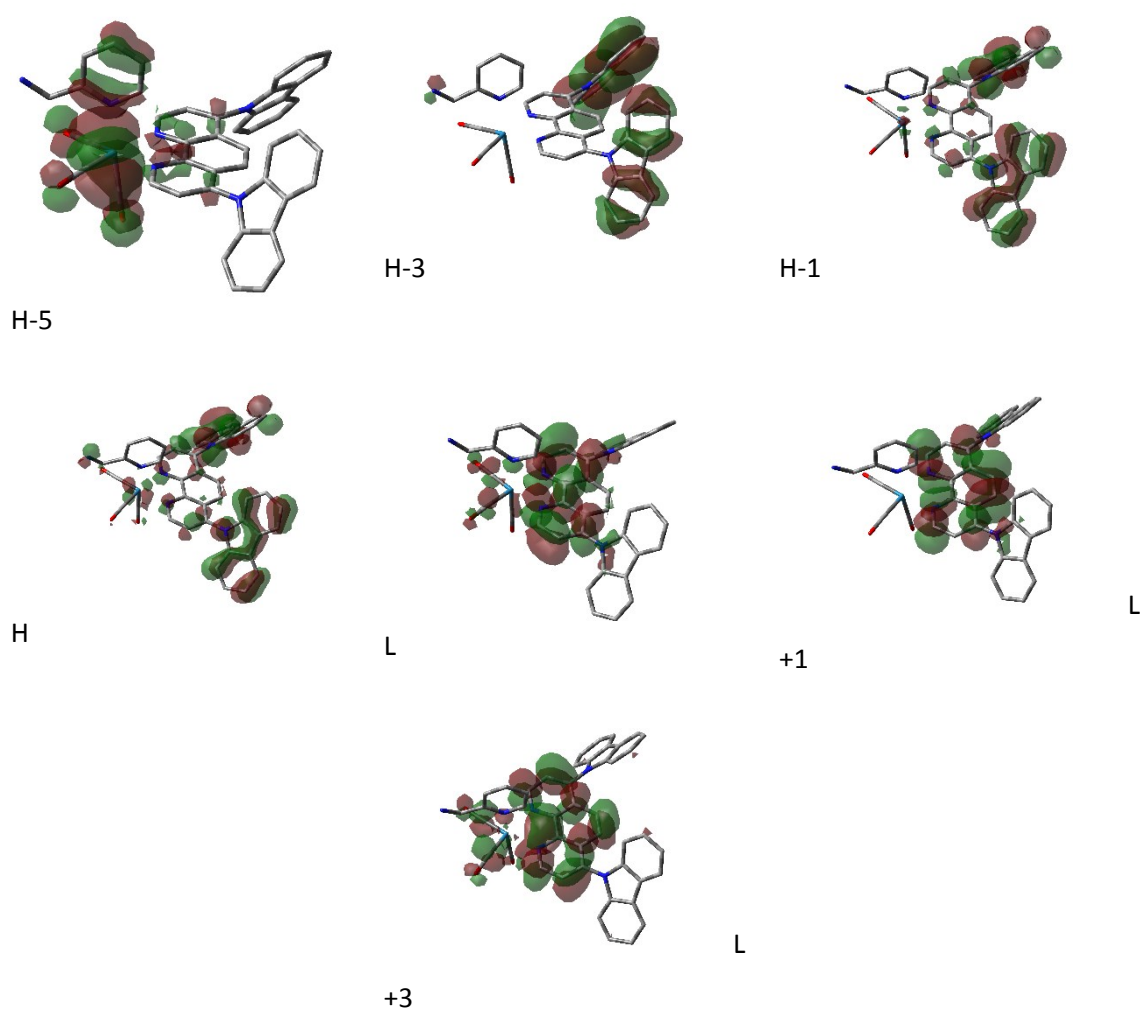

**Table S3:** Theoretical spectral parameters of  $fac-[Re(L)(CO)_3(cbz_2phen)]^+$  complexes in acetonitrile.

| X    | Transition (contribution) | E (nm) | Oscillator strength | Mainly Character            |
|------|---------------------------|--------|---------------------|-----------------------------|
| py   | H-1→L (78%)               | 455    | 0,2103              | ILCT <sub>cbz2phen</sub>    |
|      | H→L+1 (21)                |        |                     | ILCT <sub>cbz2phen</sub>    |
|      | H→L (94%)                 | 454    | 0,2596              | ILCT <sub>cbz2phen</sub>    |
|      | H-5 →L (97%)              | 366    | 0,0004              | MLCT <sub>Re→cbz2phen</sub> |
|      | H-1→L+3 (58%)             | 293    | 0,173               | ILCT <sub>cbz2phen</sub>    |
|      | H→L+5 (11%)               |        |                     | IL <sub>cbz2phen</sub>      |
| ampy | H-1→L (72%)               | 466    | 0,1972              | ILCT <sub>cbz2phen</sub>    |
|      | H→L (13%)                 |        |                     | ILCT <sub>cbz2phen</sub>    |
|      | H→L+1 (13%)               |        |                     | ILCT <sub>cbz2phen</sub>    |
|      | H-1→L (11%)               | 465    | 0,2386              | ILCT <sub>cbz2phen</sub>    |
|      | H→L (82%)                 |        |                     | ILCT <sub>cbz2phen</sub>    |
|      | H-5 → L (67%)             | 381    | 0,0004              | MLCT <sub>Re→cbz2phen</sub> |
|      | H-5 → L (28%)             | 381    | 0,0005              | MLCT <sub>Re→cbz2phen</sub> |
|      | H-3 → L+1 (56%)           |        |                     | ILCT <sub>cbz2phen</sub>    |
|      | H-1→L+3 (83%)             | 297    | 0,0991              | ILCT <sub>cbz2phen</sub>    |

**Figure S10:** Isosurfaces plots of frontier orbitals of *fac*-[ReCl(CO)<sub>3</sub>(phen)] and *fac*-[Re(py)(CO)<sub>3</sub>(phen)]<sup>+</sup> in acetonitrile.

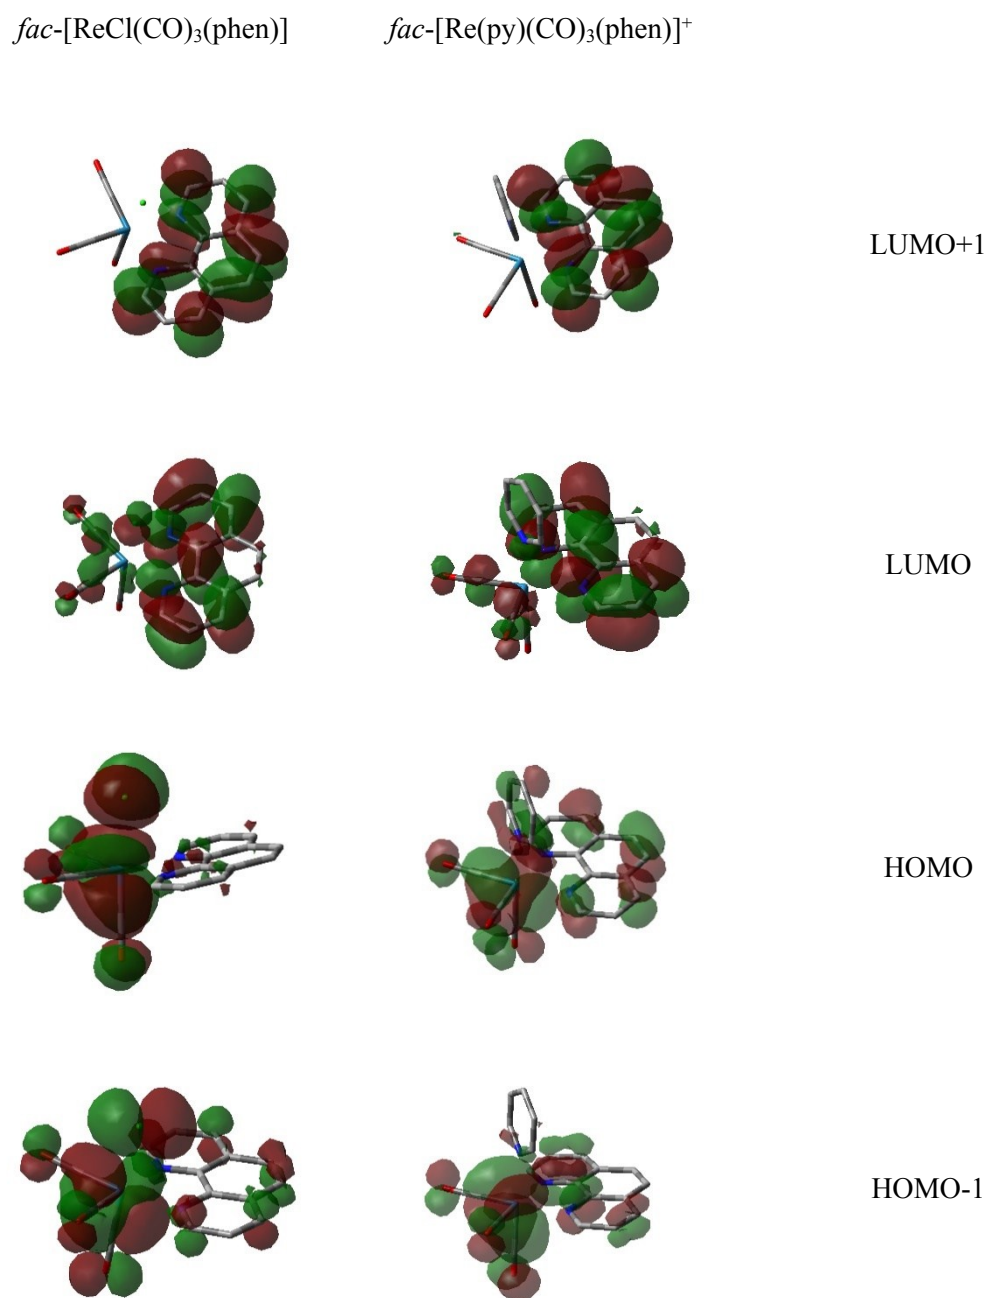

**Figure S11:** Changes in emission spectra of cbz<sub>2</sub>phen in function of Zn<sup>2+</sup> addition in acetonitrile.  $\lambda_{\text{exc}} = 355 \text{ nm}$ .

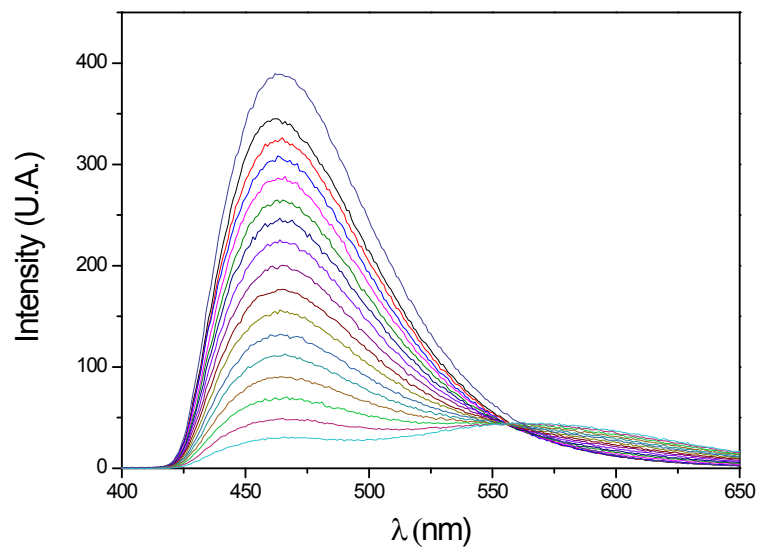

**Figure S12.** Excitation Spectra of (A) *fac*-[ReCl(CO)<sub>3</sub>(cbz<sub>2</sub>phen)]; (B) *fac*-[Re(py)(CO)<sub>3</sub>(cbz<sub>2</sub>phen)]<sup>+</sup>; (C) *fac*-[Re(ampy)(CO)<sub>3</sub>(cbz<sub>2</sub>phen)]<sup>+</sup>, probed at two different wavelengths.

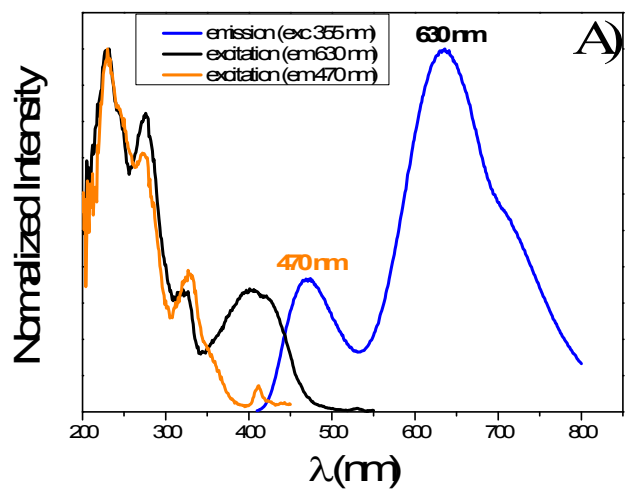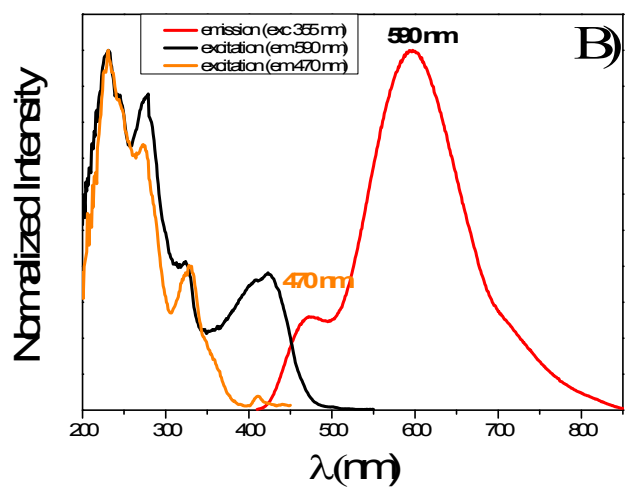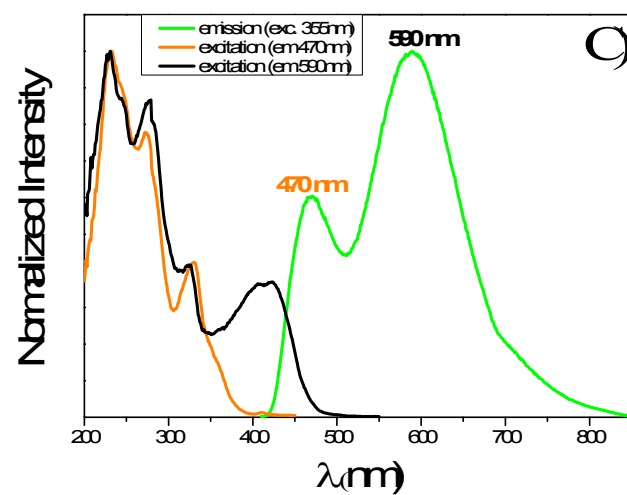

**Figure S13:** Time Resolved Photoluminescence Spectra of (A) *fac*-[ReCl(CO)<sub>3</sub>(cbz<sub>2</sub>phen)], (C) *fac*-[Re(py)(CO)<sub>3</sub>(cbz<sub>2</sub>phen)]<sup>+</sup> in acetonitrile solution, and their exponential fits (B) and (D) respectively.

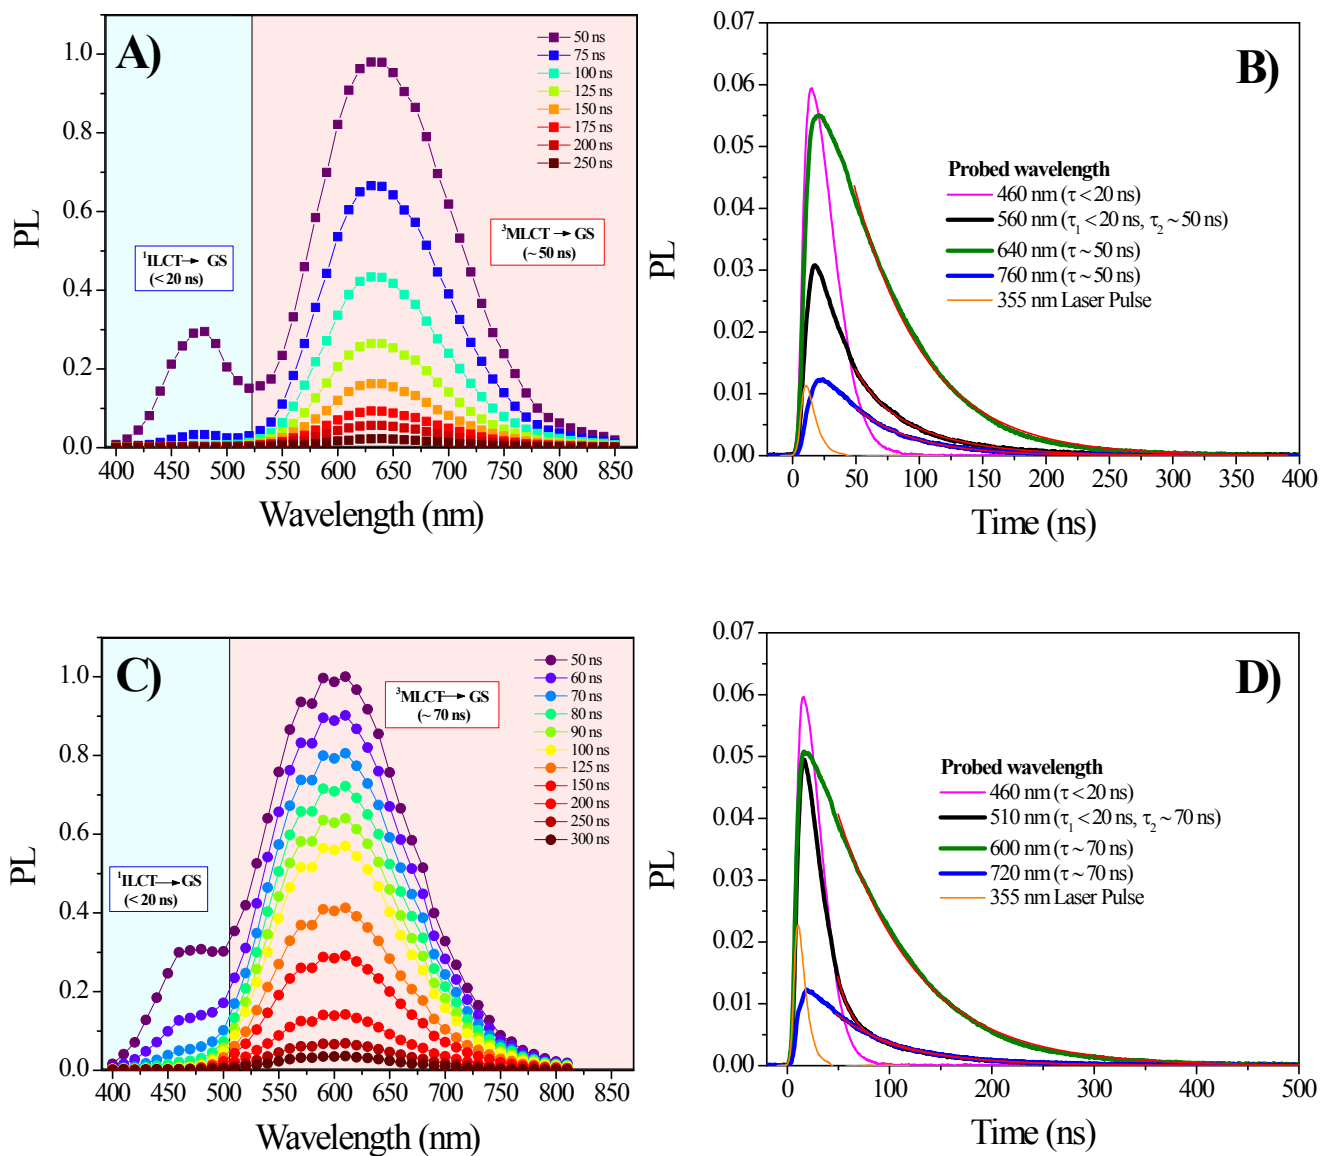

**Figure S14.** Changes in emission spectra of (A) *fac*-[ReCl(CO)<sub>3</sub>(cbz<sub>2</sub>phen)]; (B) *fac*-[Re(py)(CO)<sub>3</sub>(cbz<sub>2</sub>phen)]<sup>+</sup>; (C) *fac*-[Re(ampy)(CO)<sub>3</sub>(cbz<sub>2</sub>phen)]<sup>+</sup> in CH<sub>3</sub>CN in function of O<sub>2</sub> addition.  $\lambda_{\text{exc}} = 355$  nm. The legend inside each figure show the time, in second, of O<sub>2</sub> addition.

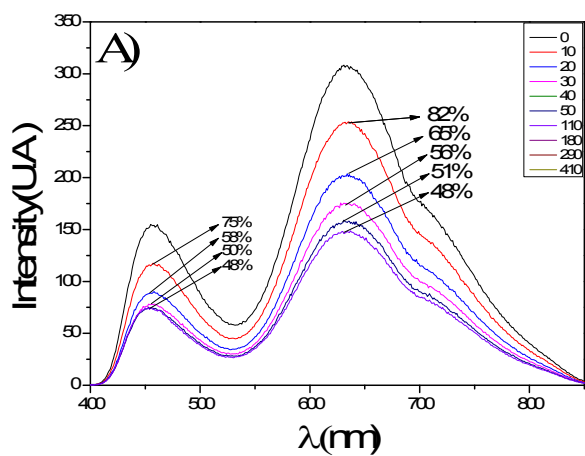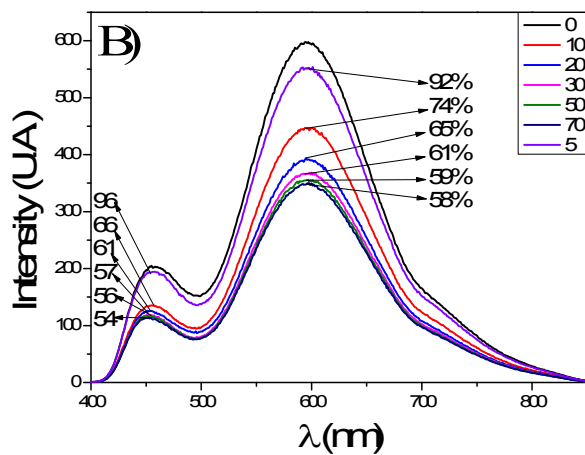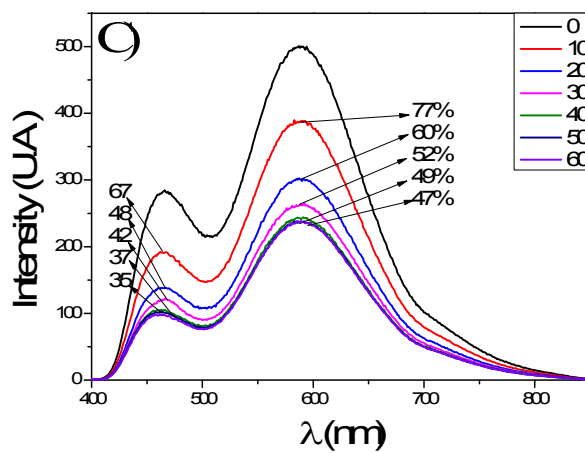



**Figure S15.** Changes in emission spectra of *fac*-[Re(py)(CO)<sub>3</sub>(phen)]<sup>+</sup> in CH<sub>3</sub>CN in function of O<sub>2</sub> addition.  $\lambda_{\text{exc}} = 355$  nm. The legend inside the figure show the time of addition of O<sub>2</sub> in second.

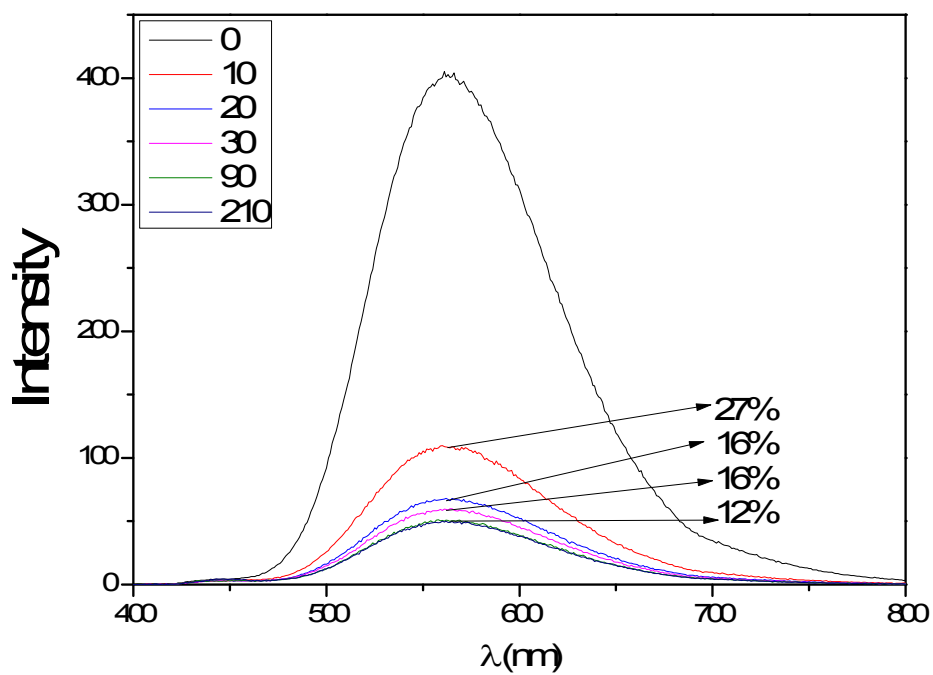

**Figure S16:** Time Resolved Photoluminescence Spectra of (A) *fac*-[ReCl(CO)<sub>3</sub>(cbz<sub>2</sub>phen)], (C) *fac*-[Re(py)(CO)<sub>3</sub>(cbz<sub>2</sub>phen)]<sup>+</sup>, (E) *fac*-[Re(ampy)(CO)<sub>3</sub>(cbz<sub>2</sub>phen)]<sup>+</sup>, in PMMA films, and their normalized spectra (B), (D) and (F) respectively.

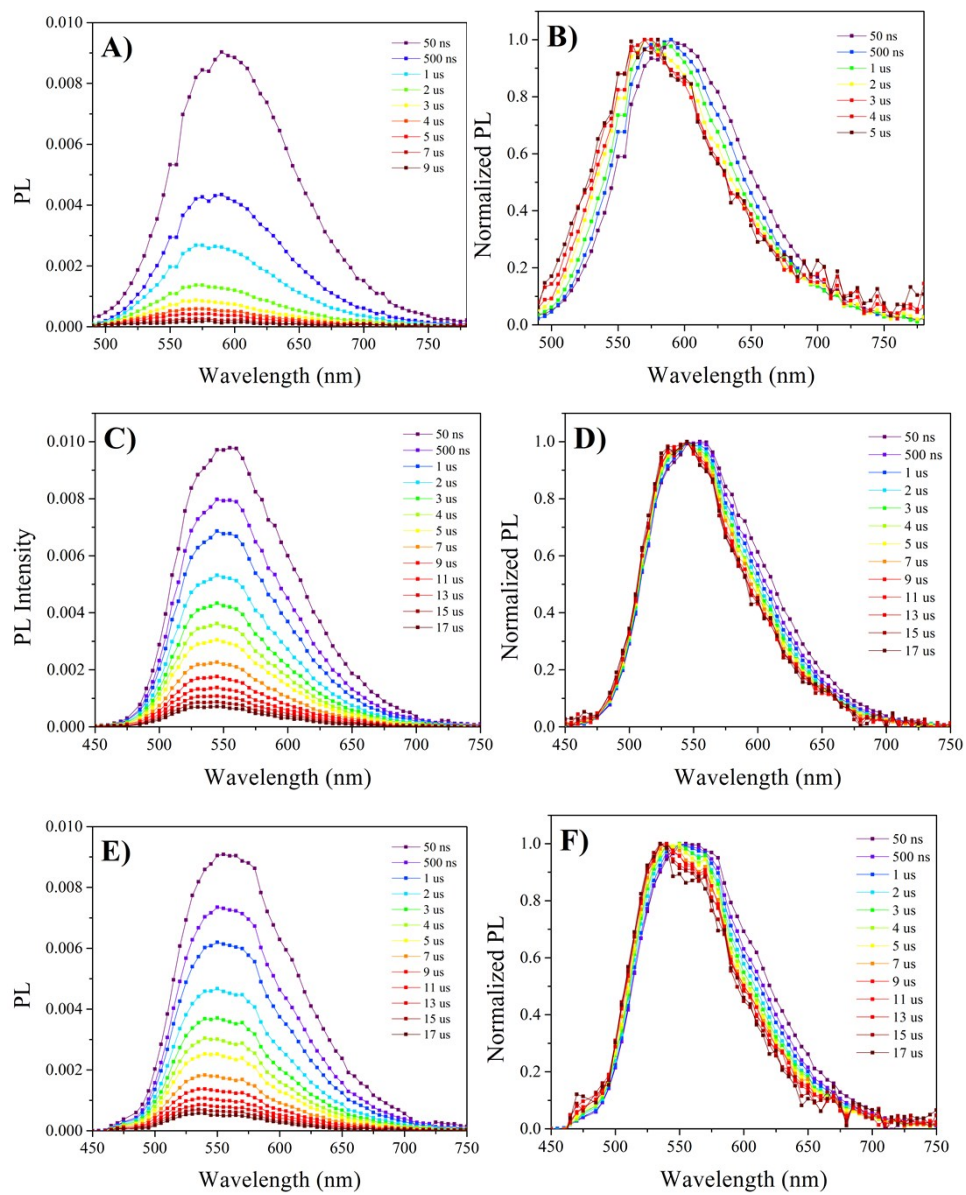

**Figure S17:** A) Experimental (dotted points) and simulated (solid lines) time resolved photoluminescence of (A) *fac*-[ReCl(CO)<sub>3</sub>(cbz<sub>2</sub>phen)] and (C) *fac*-[Re(py)(CO)<sub>3</sub>(cbz<sub>2</sub>phen)]<sup>+</sup> dispersed in PMMA film. The inset shows the obtained DAS Spectra containing the deconvoluted emitter states. (B) and (D) are the deconvoluted emission bands at different time delays for comparison. The inset diagram depicts the proposed dynamics for all compounds when in rigid PMMA medium.

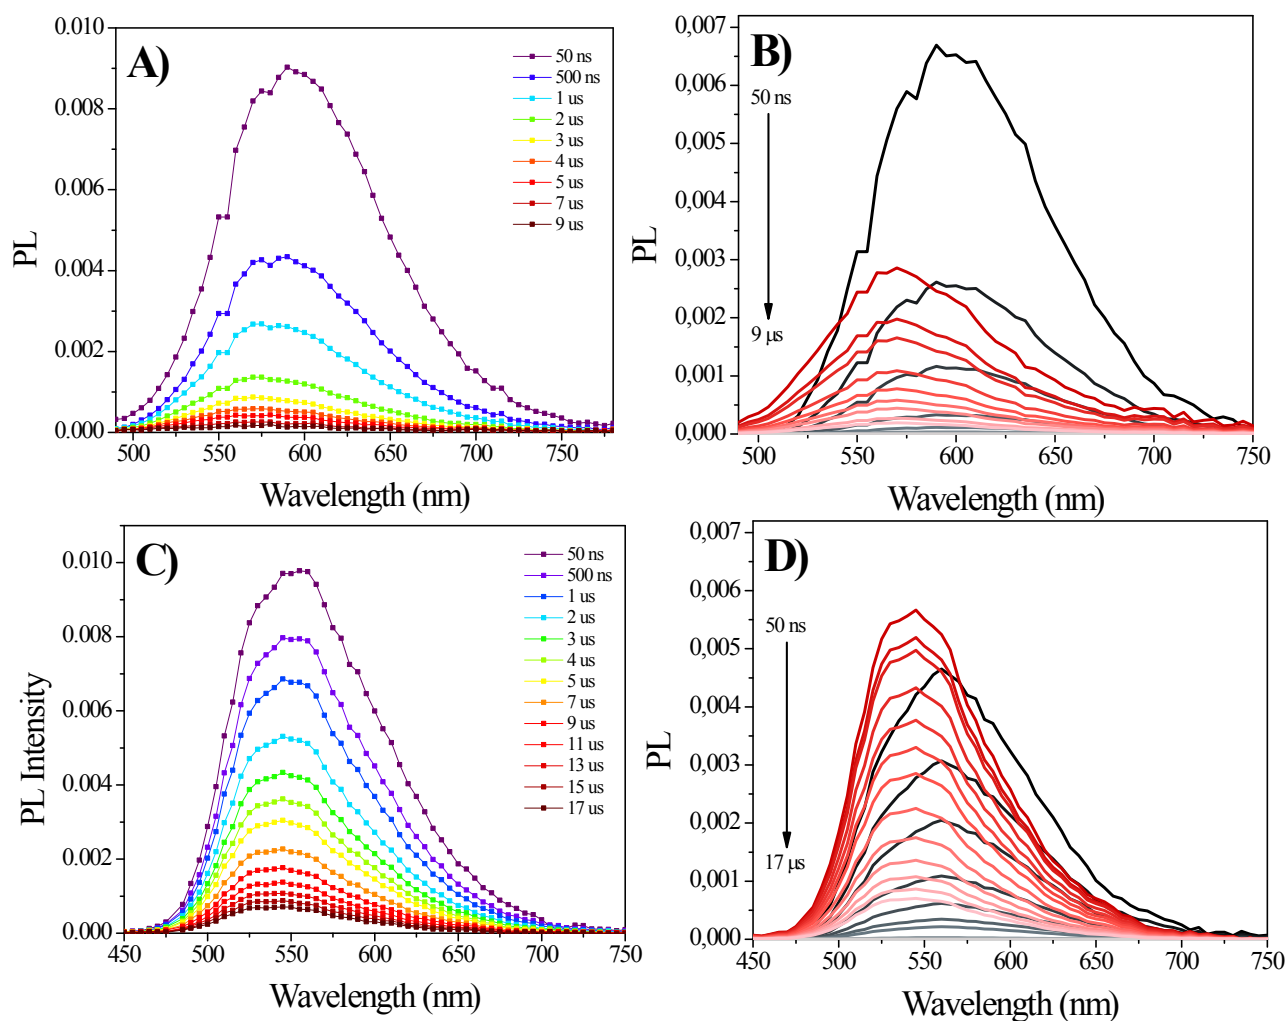

**Figure S18:** Bi-exponential fit at different wavelengths of the PL spectrum of (A) *fac*-[ReCl(CO)<sub>3</sub>(cbz<sub>2</sub>phen)]<sup>+</sup>/PMMA, (B) *fac*-[Re(py)(CO)<sub>3</sub>(cbz<sub>2</sub>phen)]<sup>+</sup>/PMMA and (C) *fac*-[Re(ampy)(CO)<sub>3</sub>(phen)]<sup>+</sup>/PMMA.

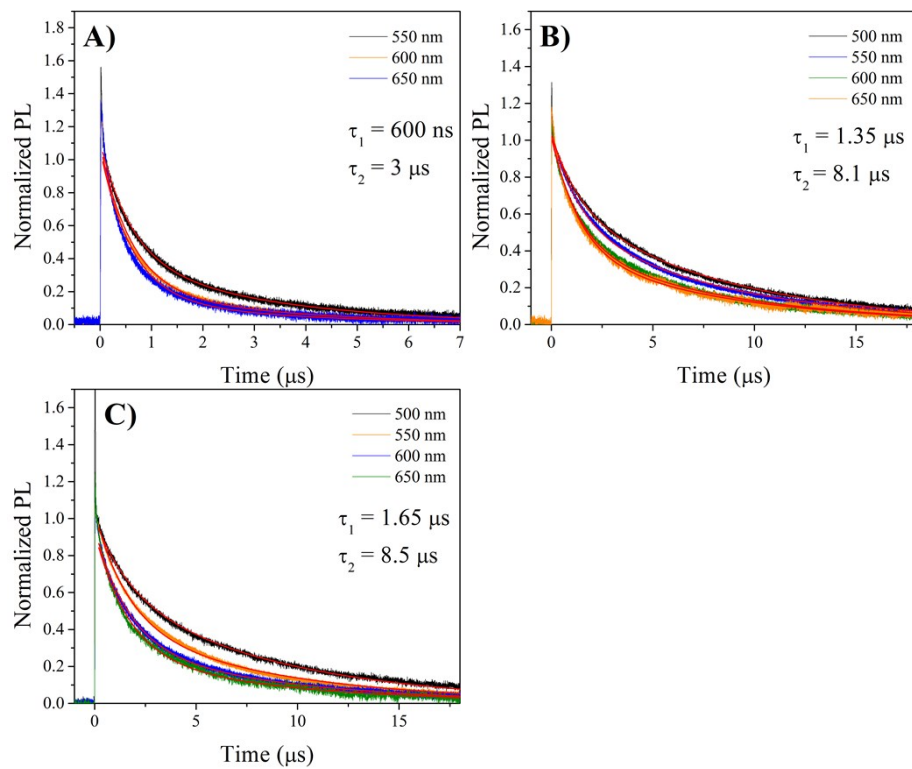

Supplement: c6dt01112h1.pdf [file c6dt01112h1.pdf]
